# Supplementary material for: The Overlooked Issue of Outpatient Combination Antibiotic Prescribing in Low- and Middle-Income Countries: An Example from Syria
Source: MDPI journal article supplement (doi:10.3390/antibiotics11010074), 2022-01-09
Supplement: s1 [file s1]

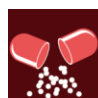

**Table S1.** Top 10 antibiotic combinations in patients of different sex according to the number of prescriptions and number of prescriptions per 1000 persons per year.

| Sex          | ATC (INN)                                                 | No (%)        | Rate*  |
|--------------|-----------------------------------------------------------|---------------|--------|
| Female       | J01CR02+J01DD04 (Coamoxiclav+Ceftriaxone)                 | 981(16.20%)   | 19.37  |
|              | J01CR02+J01DD63 (Amoxicillin and BLI+Ceftriaxone and BLI) | 486(8.03%)    | 9.60   |
|              | J01DD63+J01FA09 (Ceftriaxone and BLI+Clarithromycin)      | 255(4.21%)    | 5.04   |
|              | J01DD04+J01DD08 (Ceftriaxone+Cefixime)                    | 233(3.85%)    | 4.60   |
|              | J01DC02+J01DD04 (Cefuroxime+Ceftriaxone)                  | 230(3.80%)    | 4.54   |
|              | J01DD04+J01FA09 (Ceftriaxone+Clarithromycin)              | 214(3.53%)    | 4.23   |
|              | J01DD04+J01DD15 (Ceftriaxone+Cefdinir)                    | 185(3.06%)    | 3.65   |
|              | J01DD08+J01DD63 (Cefixime+Ceftriaxone and BLI)            | 162(2.68%)    | 3.20   |
|              | J01DC02+J01DD63 (Cefuroxime+Ceftriaxone and BLI)          | 162(2.68%)    | 3.20   |
|              | J01CR02+J01FF02 (Amoxicillin and BLI+Lincomycin)          | 136(2.25%)    | 2.69   |
|              | Top 10 Total                                              | 3044(50.27%)  | 60.11  |
|              | Other                                                     | 3011(49.73%)  | 59.46  |
| Total Female |                                                           | 6055(100.00%) | 119.56 |
| Male         | J01CR02+J01DD04 (Amoxicillin and BLI+Ceftriaxone)         | 586(20.60%)   | 19.11  |
|              | J01CR02+J01DD63 (Amoxicillin and BLI+Ceftriaxone and BLI) | 237(8.33%)    | 7.73   |
|              | J01DD63+J01FA09 (Ceftriaxone and BLI+Clarithromycin)      | 136(4.78%)    | 4.43   |
|              | J01DD04+J01FA09 (Ceftriaxone+Clarithromycin)              | 116(4.08%)    | 3.78   |
|              | J01DD04+J01DD08 (Ceftriaxone+Cefixime)                    | 103(3.62%)    | 3.36   |
|              | J01CR02+J01FF02 (Amoxicillin and BLI+Lincomycin)          | 82(2.88%)     | 2.67   |
|              | J01DD04+J01FA10 (Ceftriaxone+Azithromycin)                | 79(2.78%)     | 2.58   |
|              | J01DD08+J01DD63 ( Cefixime+Ceftriaxone and BLI)           | 69(2.43%)     | 2.25   |
|              | J01CA04+J01FA09 (Amoxicillin+Clarithromycin)              | 68(2.39%)     | 2.22   |
|              | J01DC02+J01DD04 (Cefuroxime+Ceftriaxone)                  | 68(2.39%)     | 2.22   |
|              | Top 10 Yotal                                              | 1544(54.29%)  | 50.34  |
|              | Other                                                     | 1300(45.71%)  | 42.39  |
| Total Male   |                                                           | 2844(100.00%) | 92.73  |

\*No of prescriptions per 1000 persons/ year.
